# Supplementary material for: Unprecedented cubane-type silver cluster with a novel phosphinite functionalized N-heterocyclic carbene ligand
Source: Royal Society of Chemistry journal article supplement (doi:10.1039/b911439d), 2009-01-01

## Supporting Information for **B911439D**

### **Unprecedented cubane-type silver cluster with a novel phosphinite-functionalized *N*-heterocyclic carbene ligand**

**Matthieu Raynal,<sup>a</sup> Xianghao Liu,<sup>a</sup> Roberto Pattacini,<sup>a</sup> Christophe Vallée,<sup>b</sup> Hélène Olivier-Bourbigou<sup>b</sup> and Pierre Braunstein<sup>\*a</sup>**

- 
- Crystal structure determination of **4** (Fig. S-1)
  - NMR spectra of compounds **1-4**.

---

<sup>a</sup> Laboratoire de Chimie de Coordination, Institut de Chimie, UMR 7177 CNRS, Université de Strasbourg, 4 rue Blaise Pascal, F-67070 Strasbourg Cedex, France. E-mail: [braunstein@chimie.u-strasbg.fr](mailto:braunstein@chimie.u-strasbg.fr); Fax: +33 390 241 322.

<sup>b</sup> IFP-Lyon, Rond Point de l'Echangeur de Solaize, BP3, 69360 Solaize.

## Crystal structure determination of **4**.

The two independent molecules show a very similar structure. Their overlapped structures (blue and red spheres) are shown below (Fig. S-1).

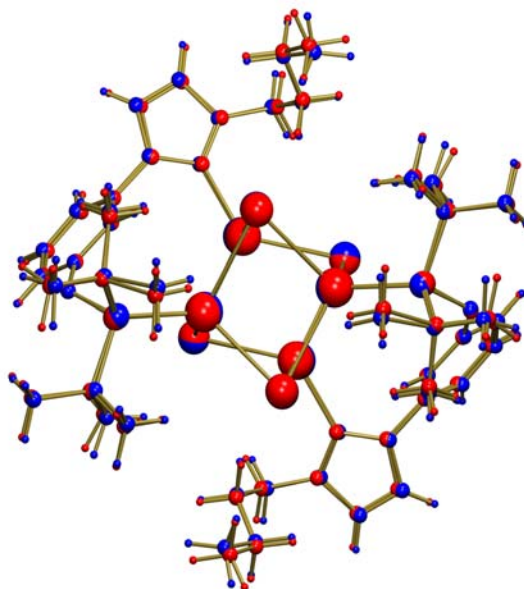

**Fig. S-1.** View of the overlapped structures of the two independent molecules of **4** which show a very similar structure.

## NMR spectra of compounds 1-4.

### Compound 1 $^1\text{H}$ NMR, $d_6$ -DMSO

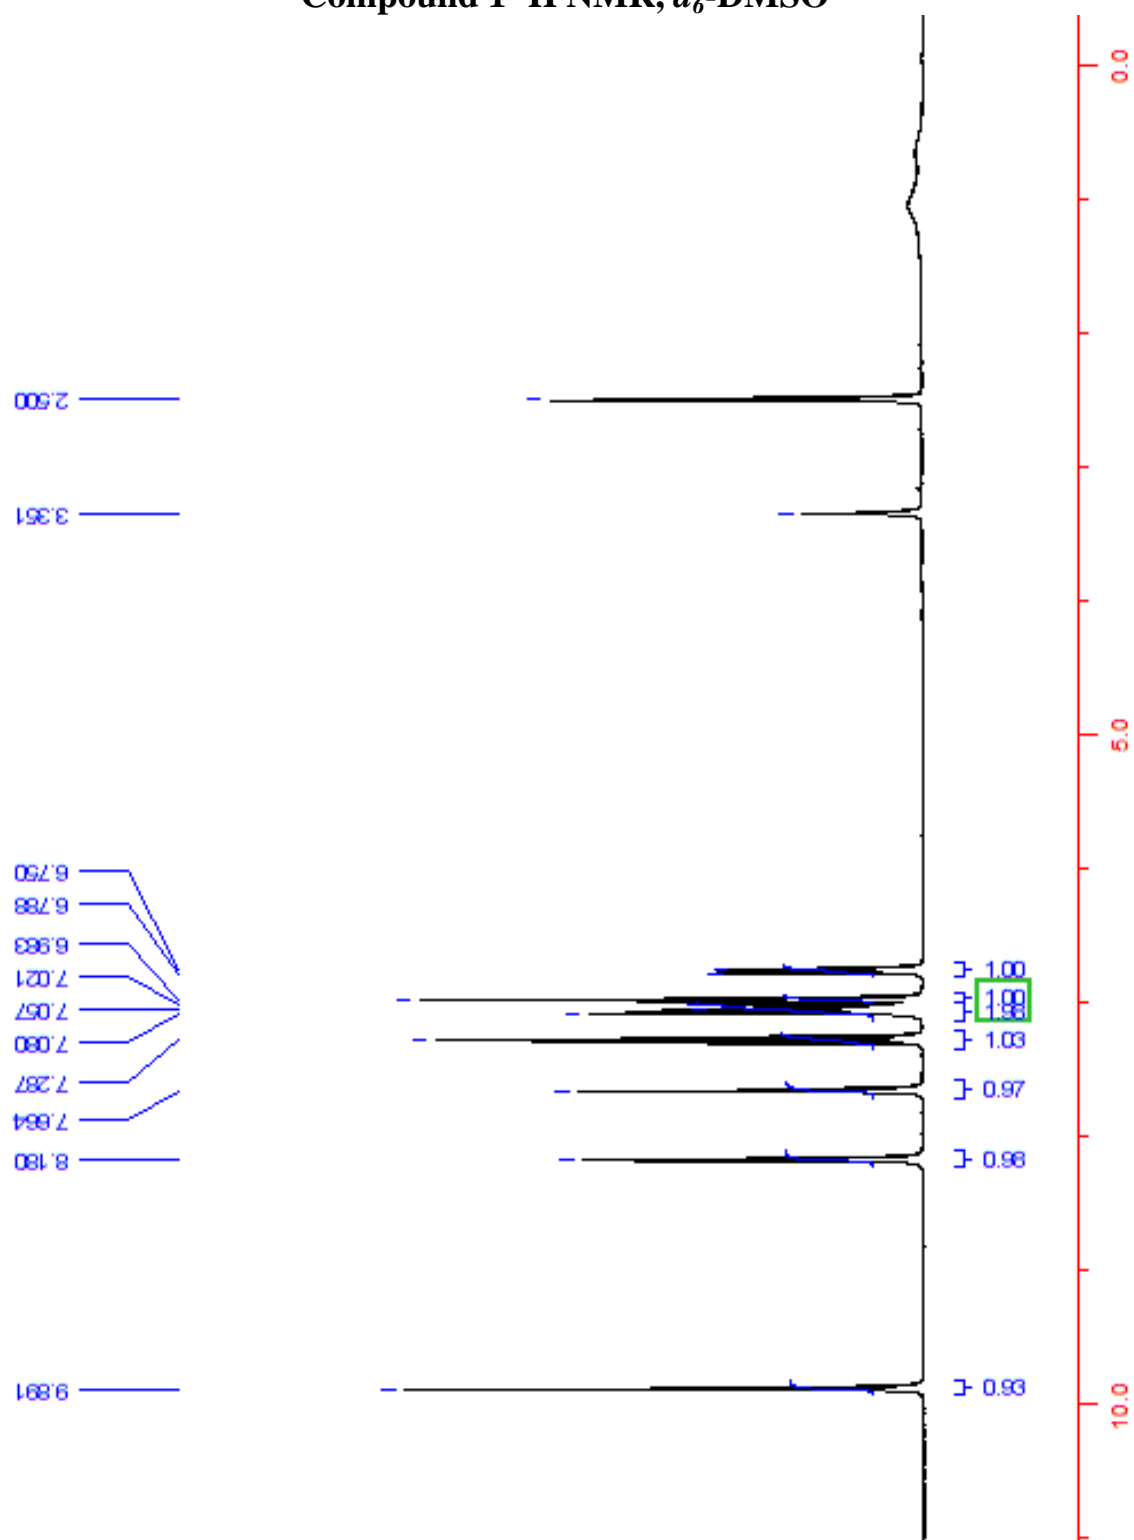

**Compound 1**  $^{13}\text{C}\{^1\text{H}\}$  NMR,  $d_6$ -DMSO

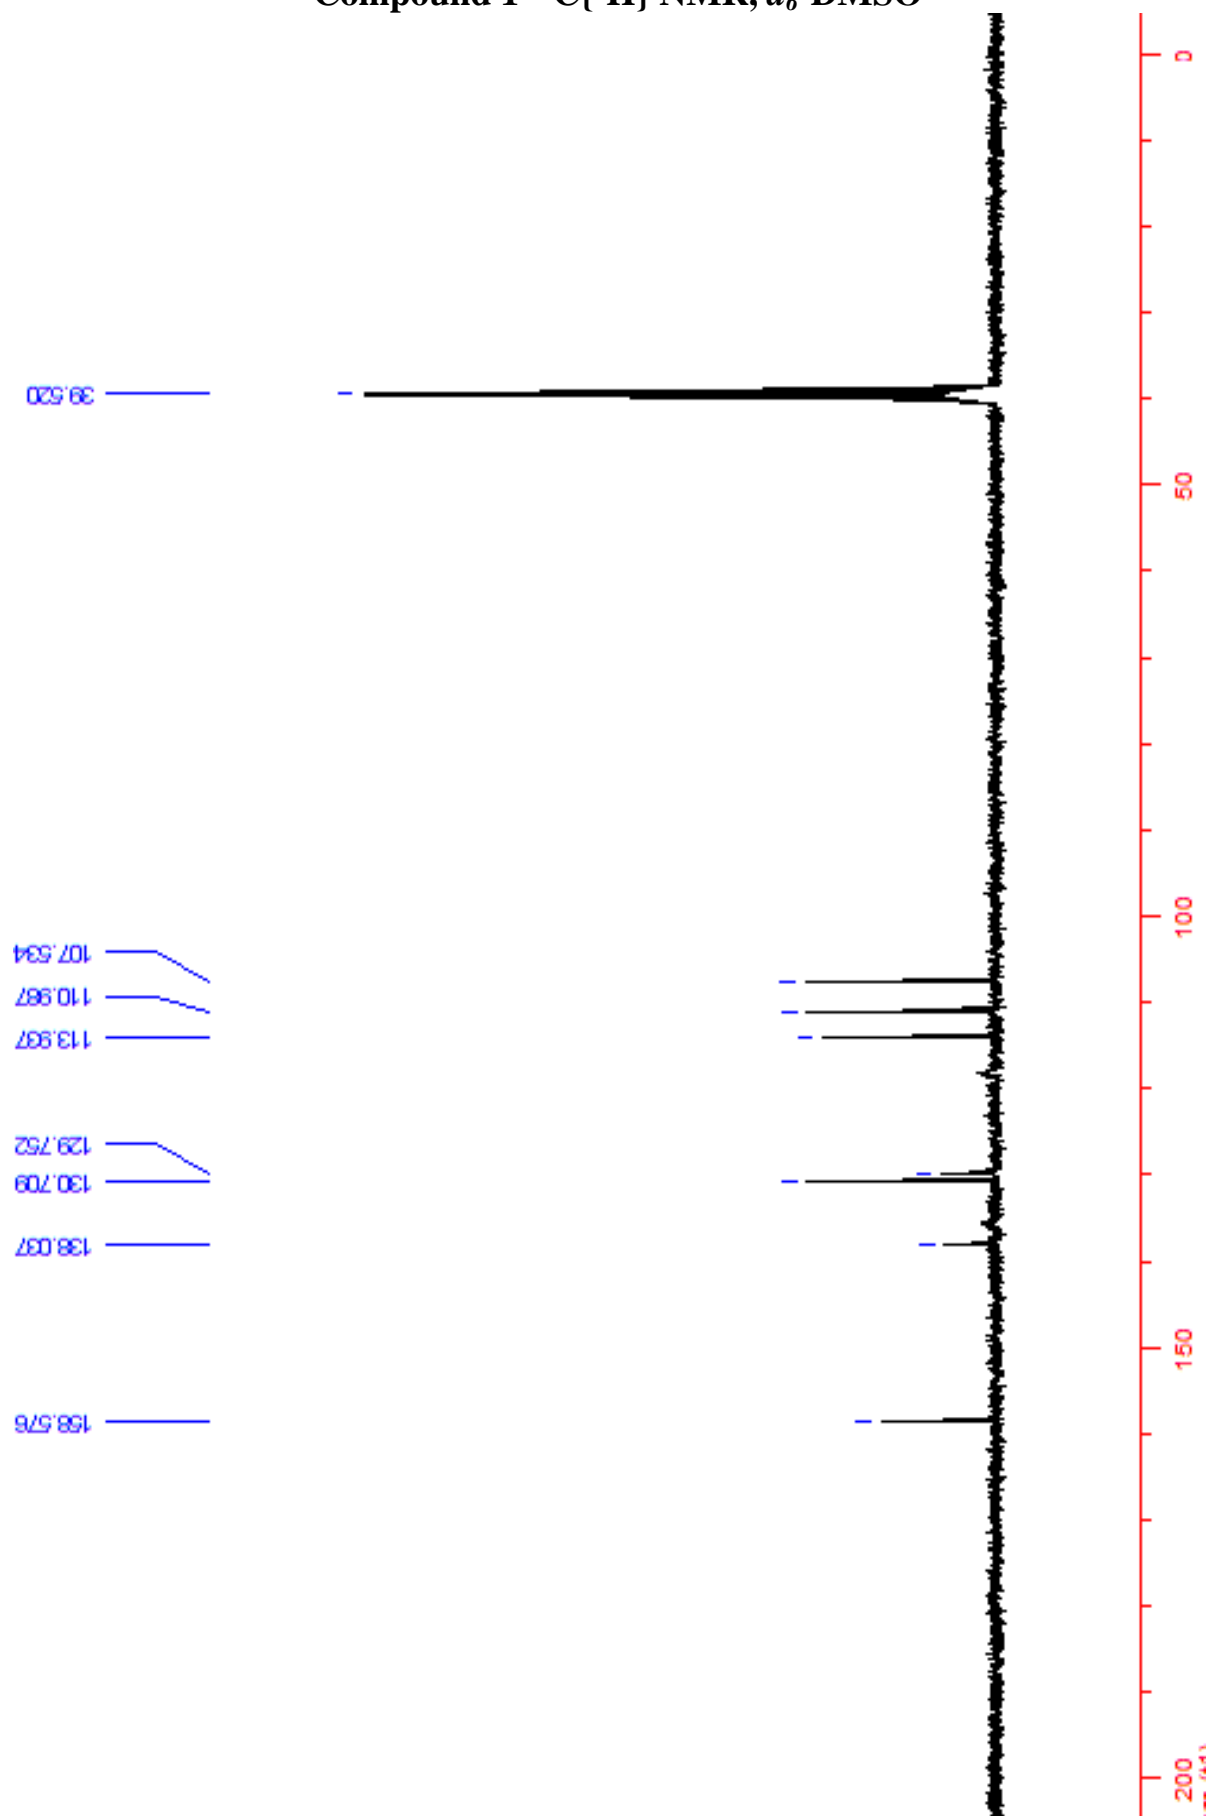

# Compound 2 $^1\text{H}$ NMR, $d_6$ -DMSO

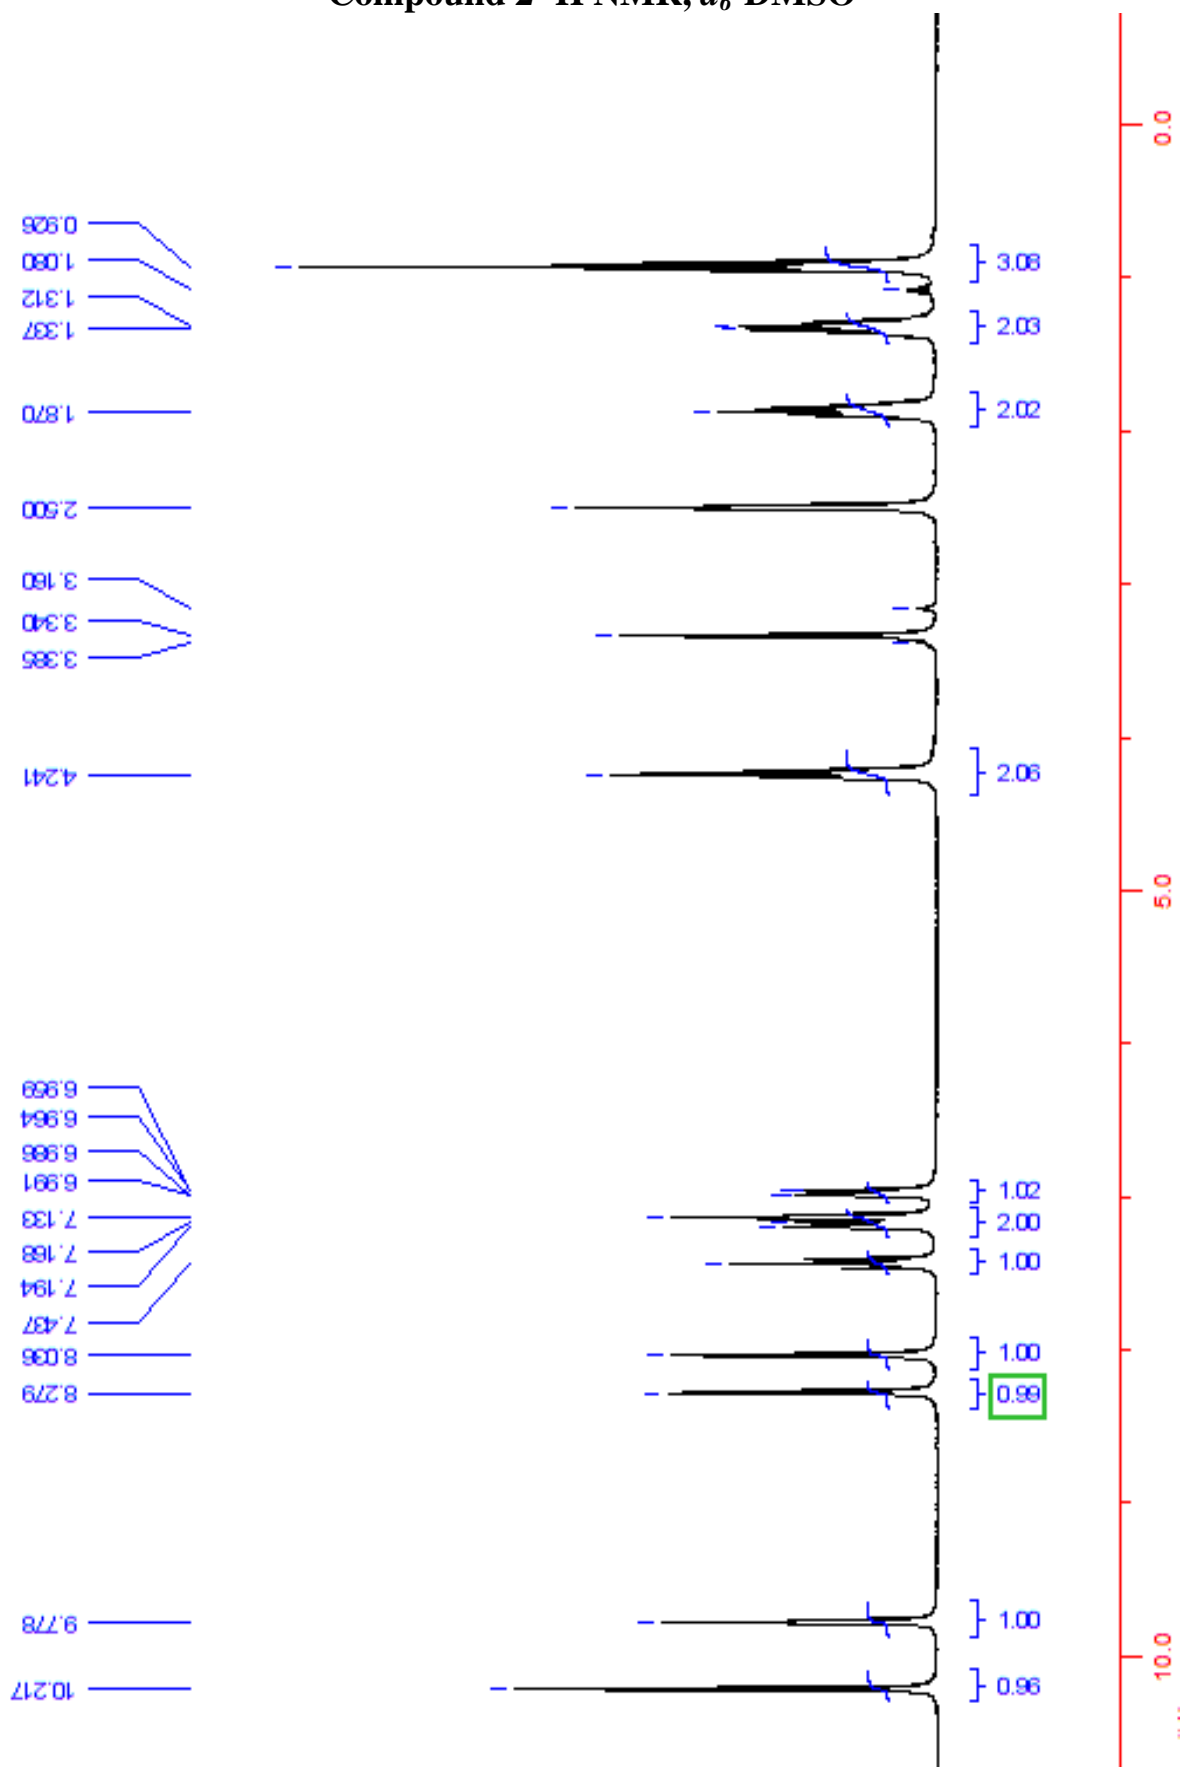

**Compound 2**  $^{13}\text{C}\{^1\text{H}\}$  NMR,  $d_6$ -DMSO

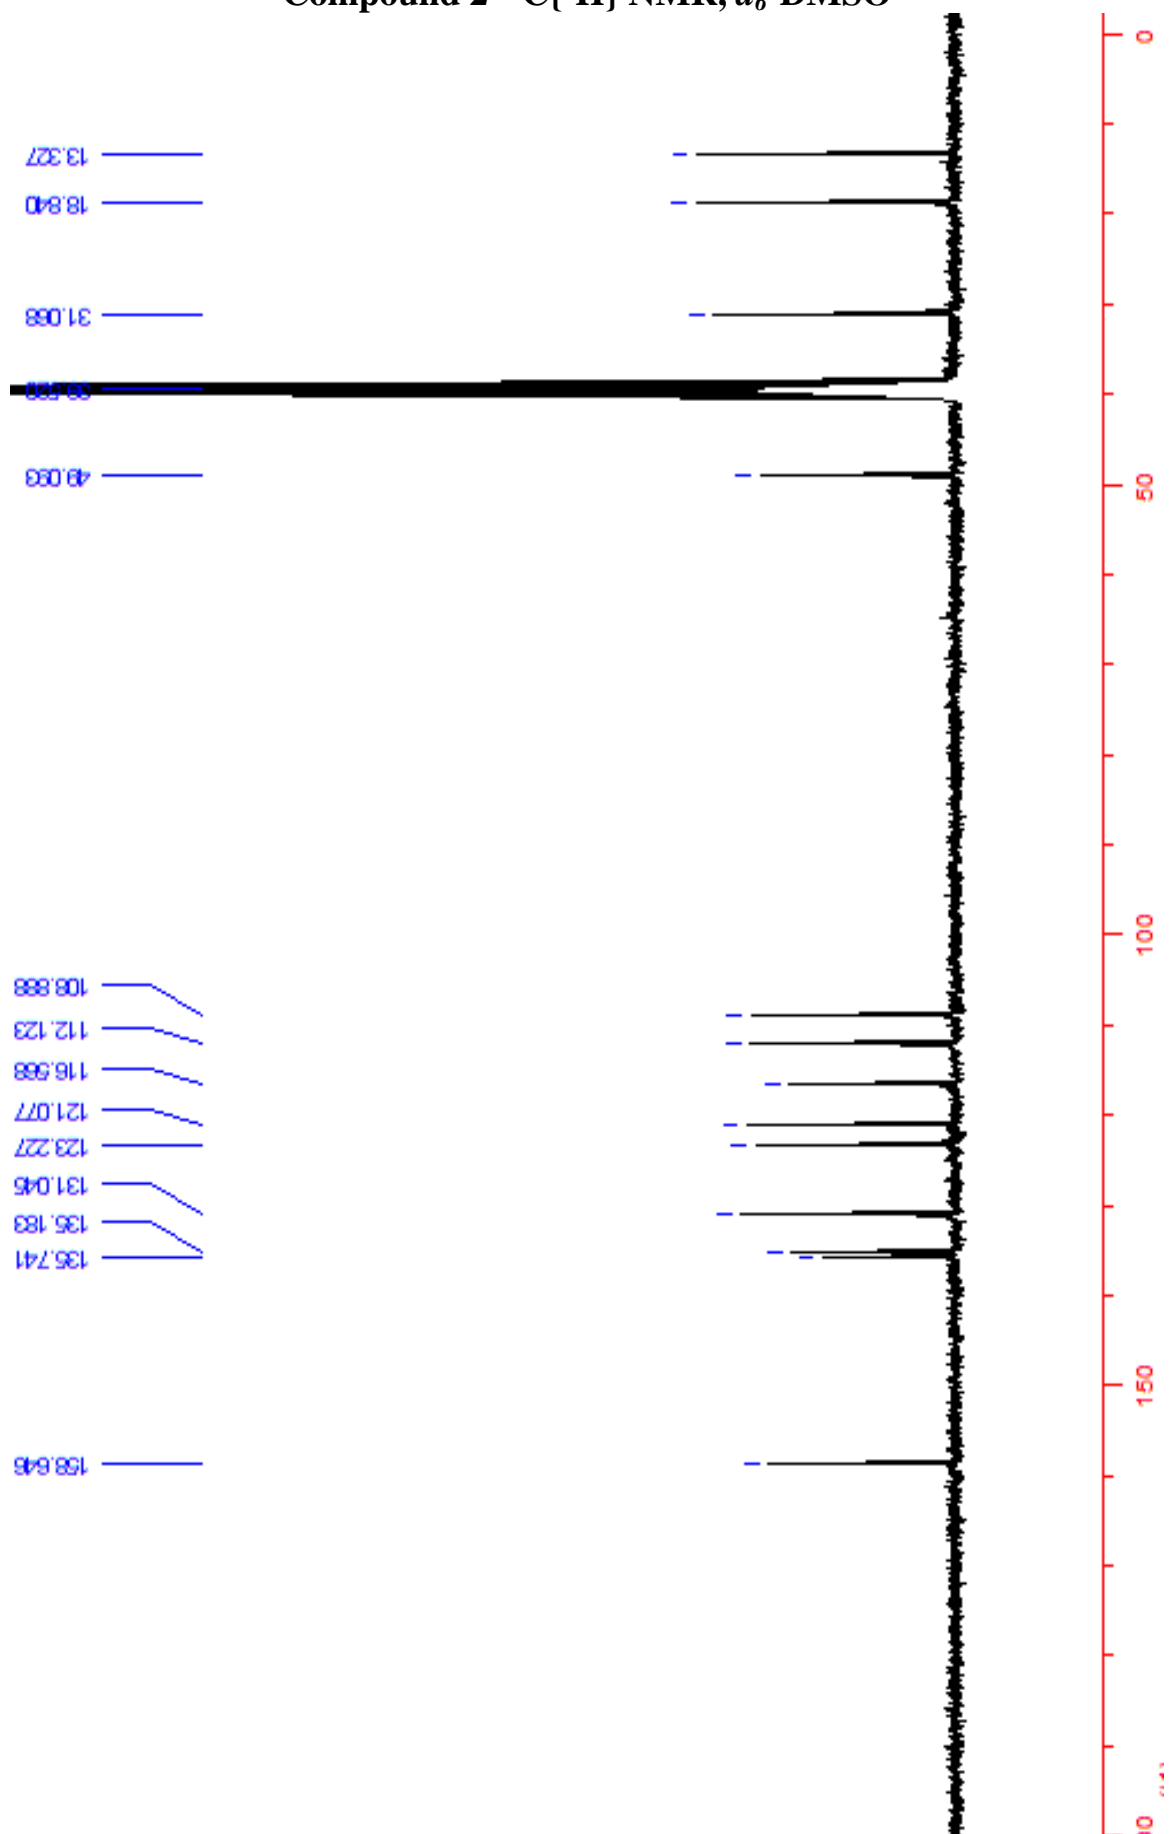

**Compound 3  $^{31}\text{P}\{^1\text{H}\}$  NMR,  $\text{CDCl}_3$**

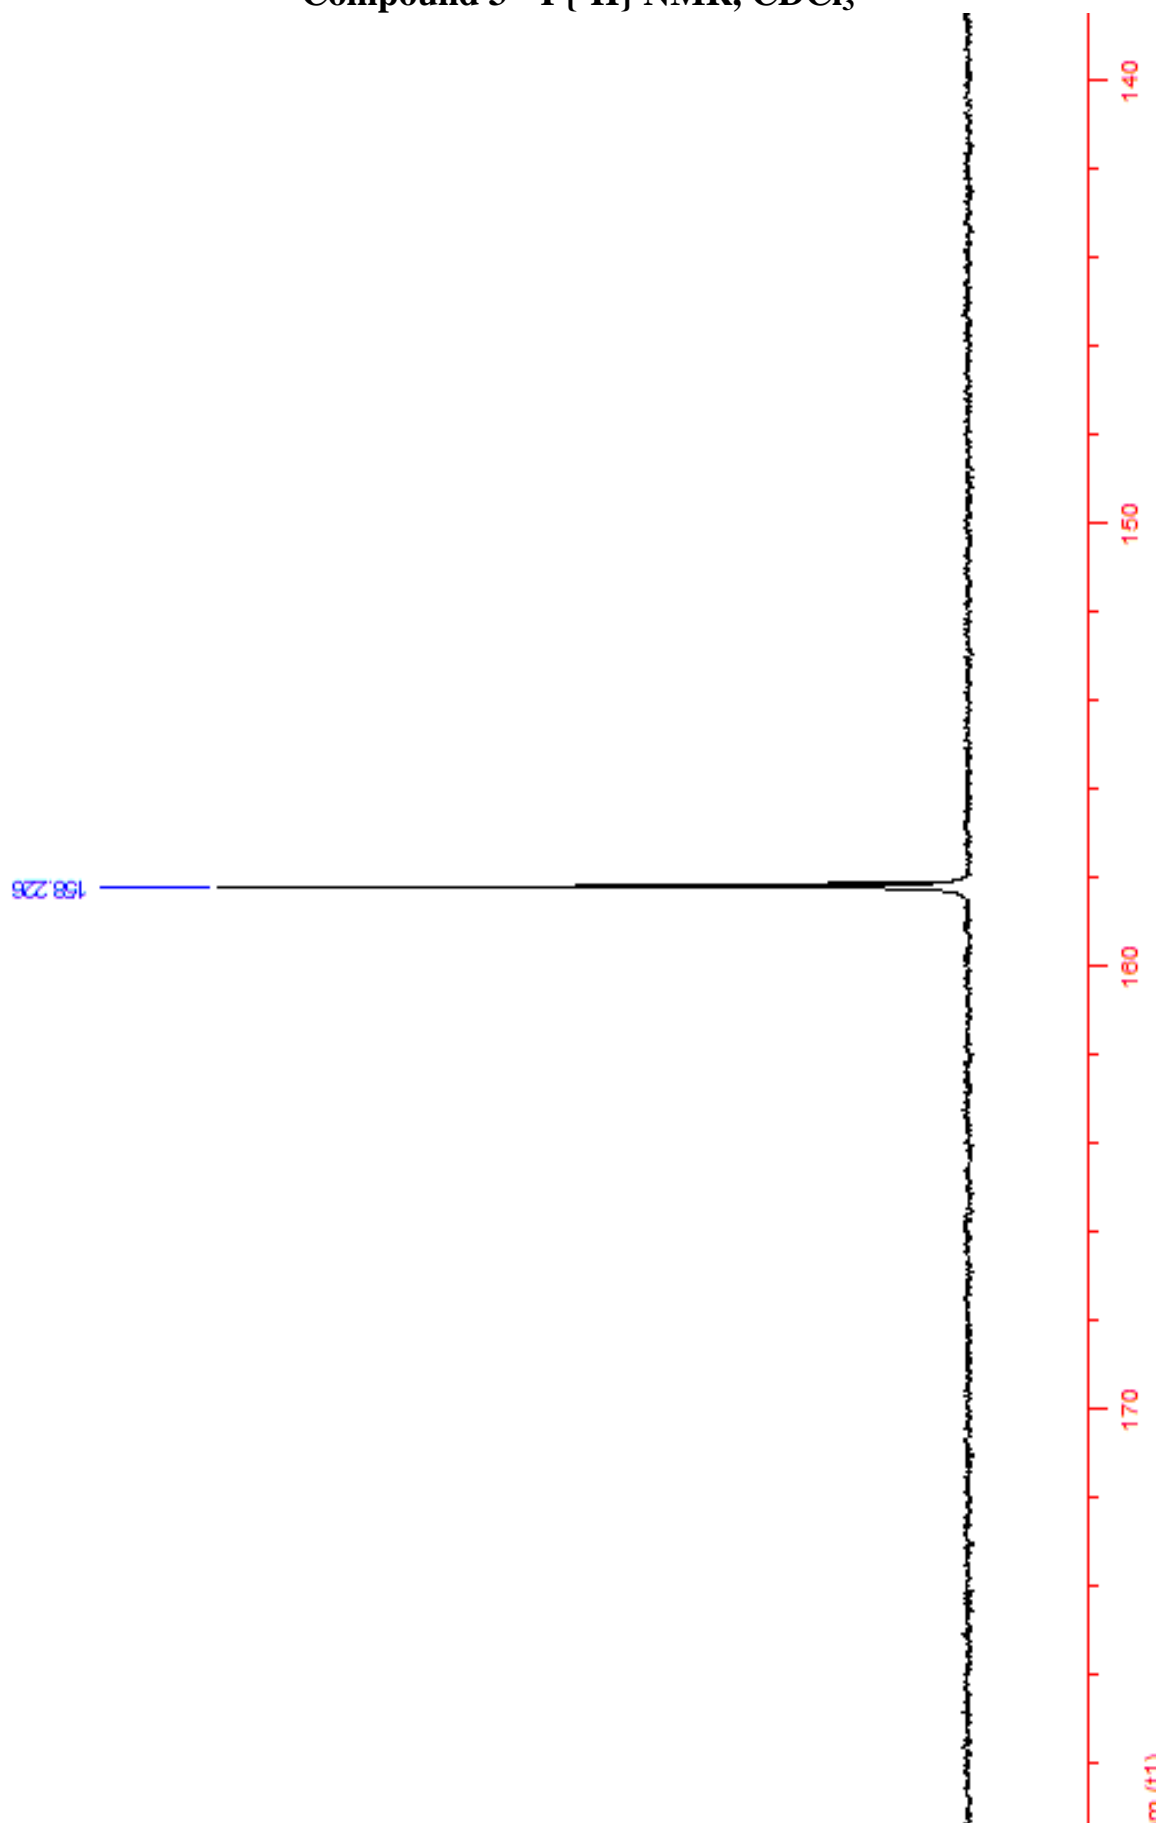

### Compound 3 $^1\text{H}$ NMR, $\text{CDCl}_3$

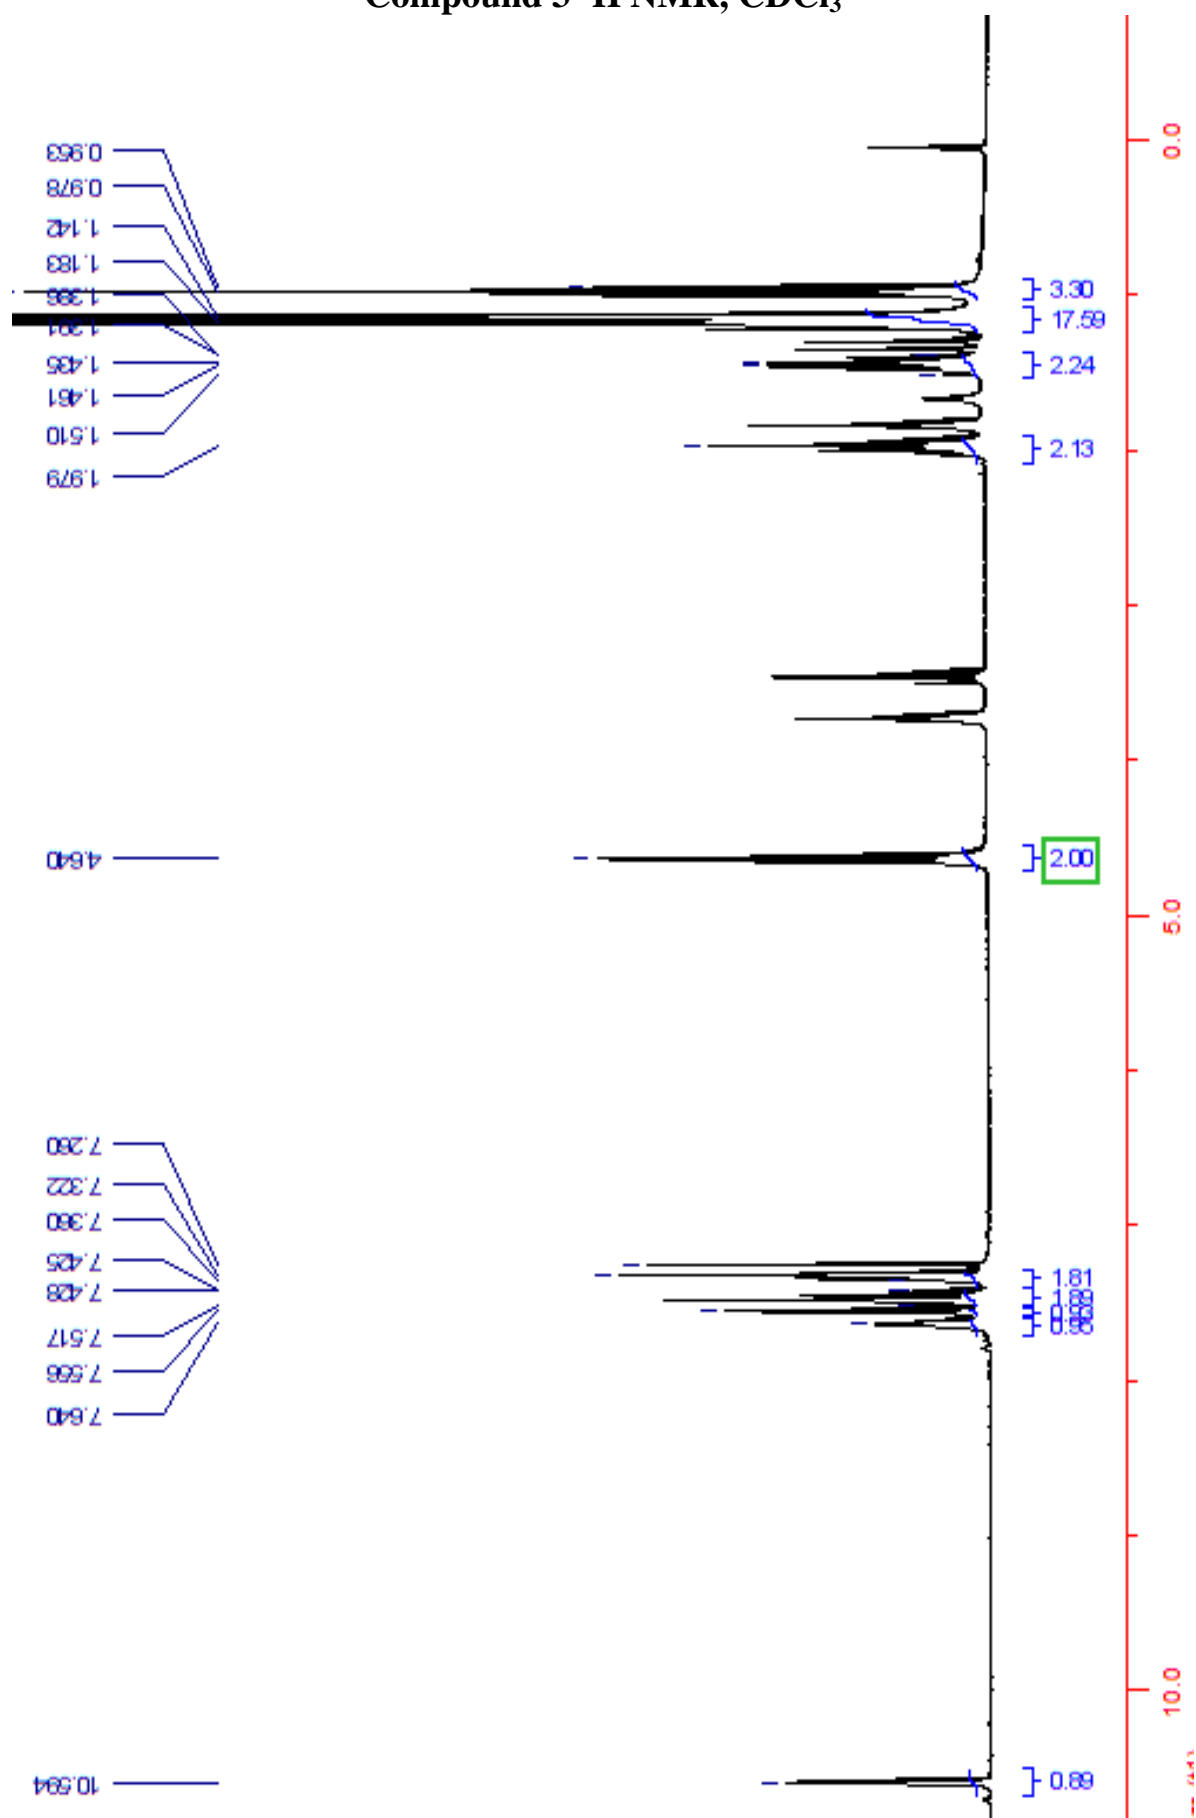

**Compound 3**  $^{13}\text{C}\{^1\text{H}\}$  NMR,  $\text{CDCl}_3$

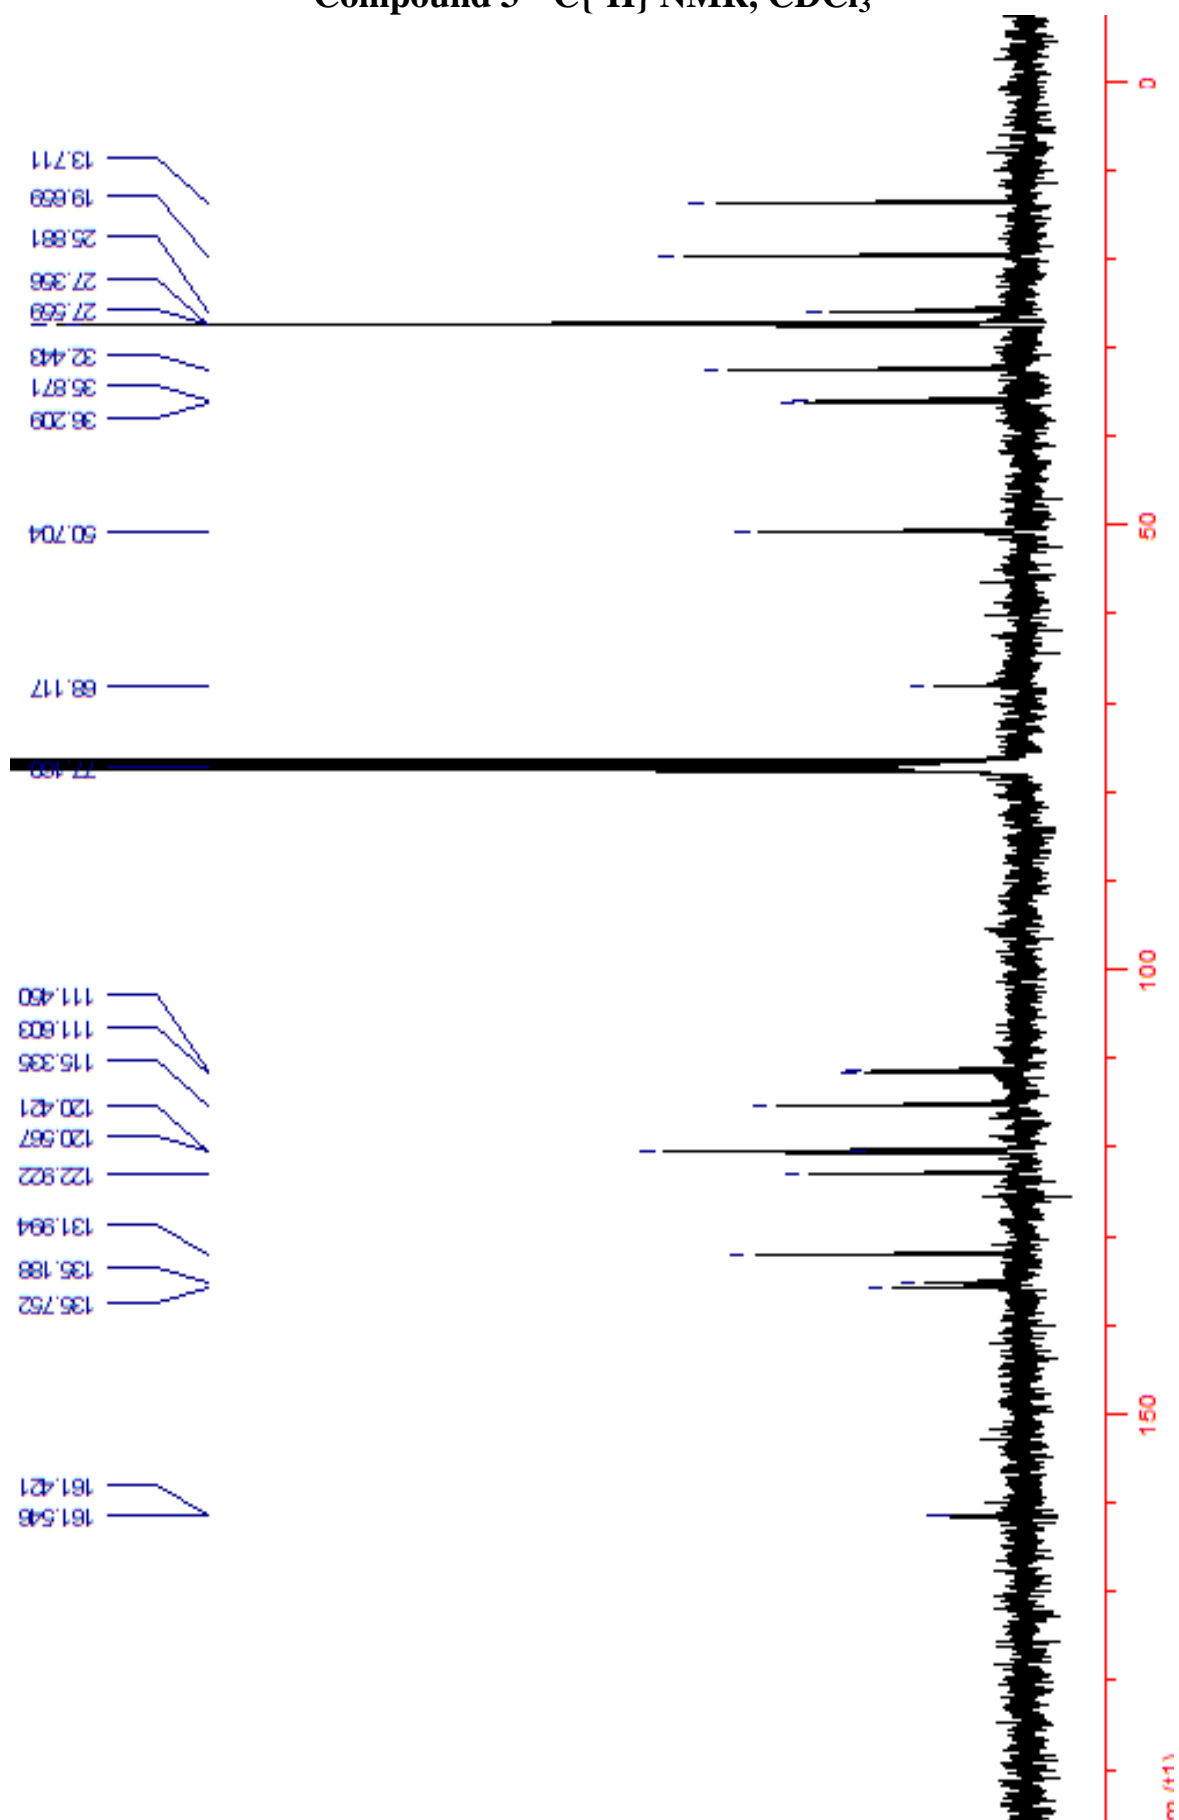

**Compound 4**  $^{31}\text{P}\{^1\text{H}\}$  NMR,  $\text{CD}_2\text{Cl}_2$

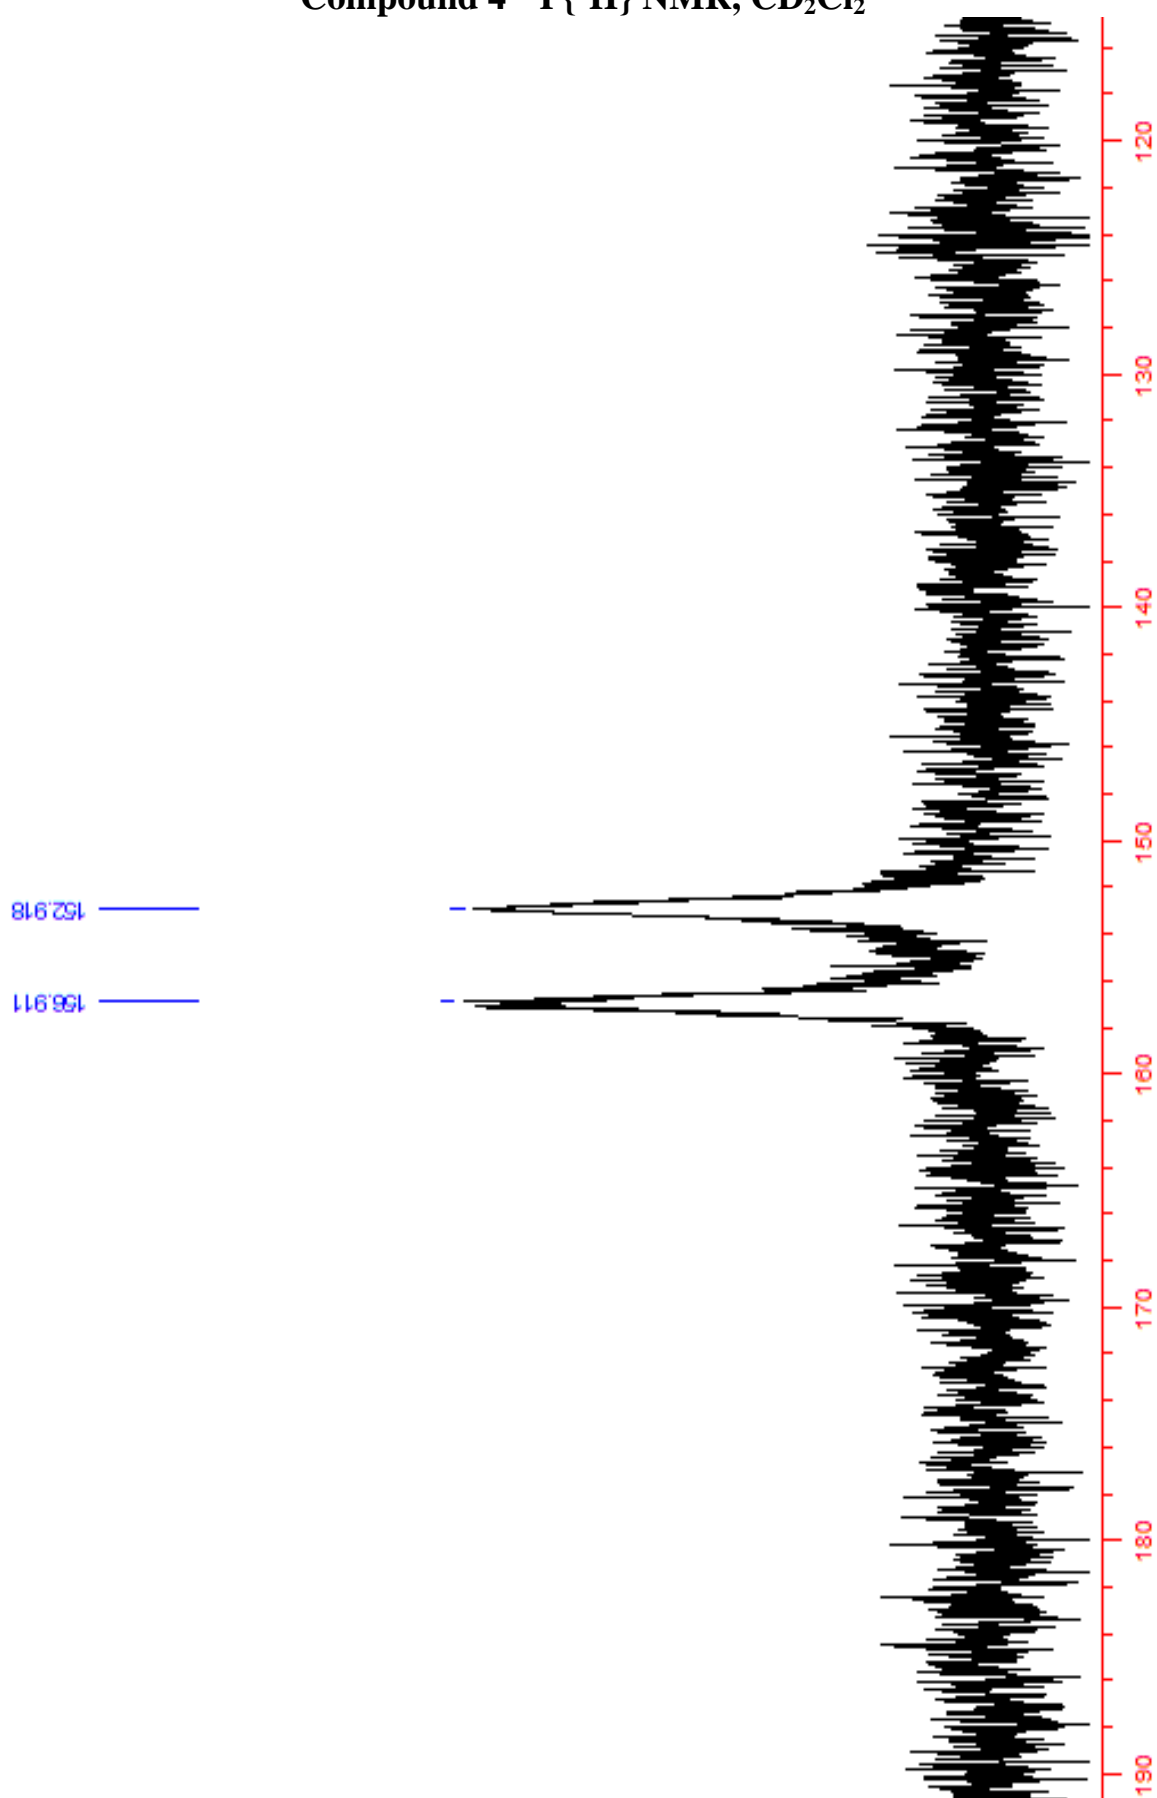

### Compound 4 $^1\text{H}$ NMR, $\text{CD}_2\text{Cl}_2$

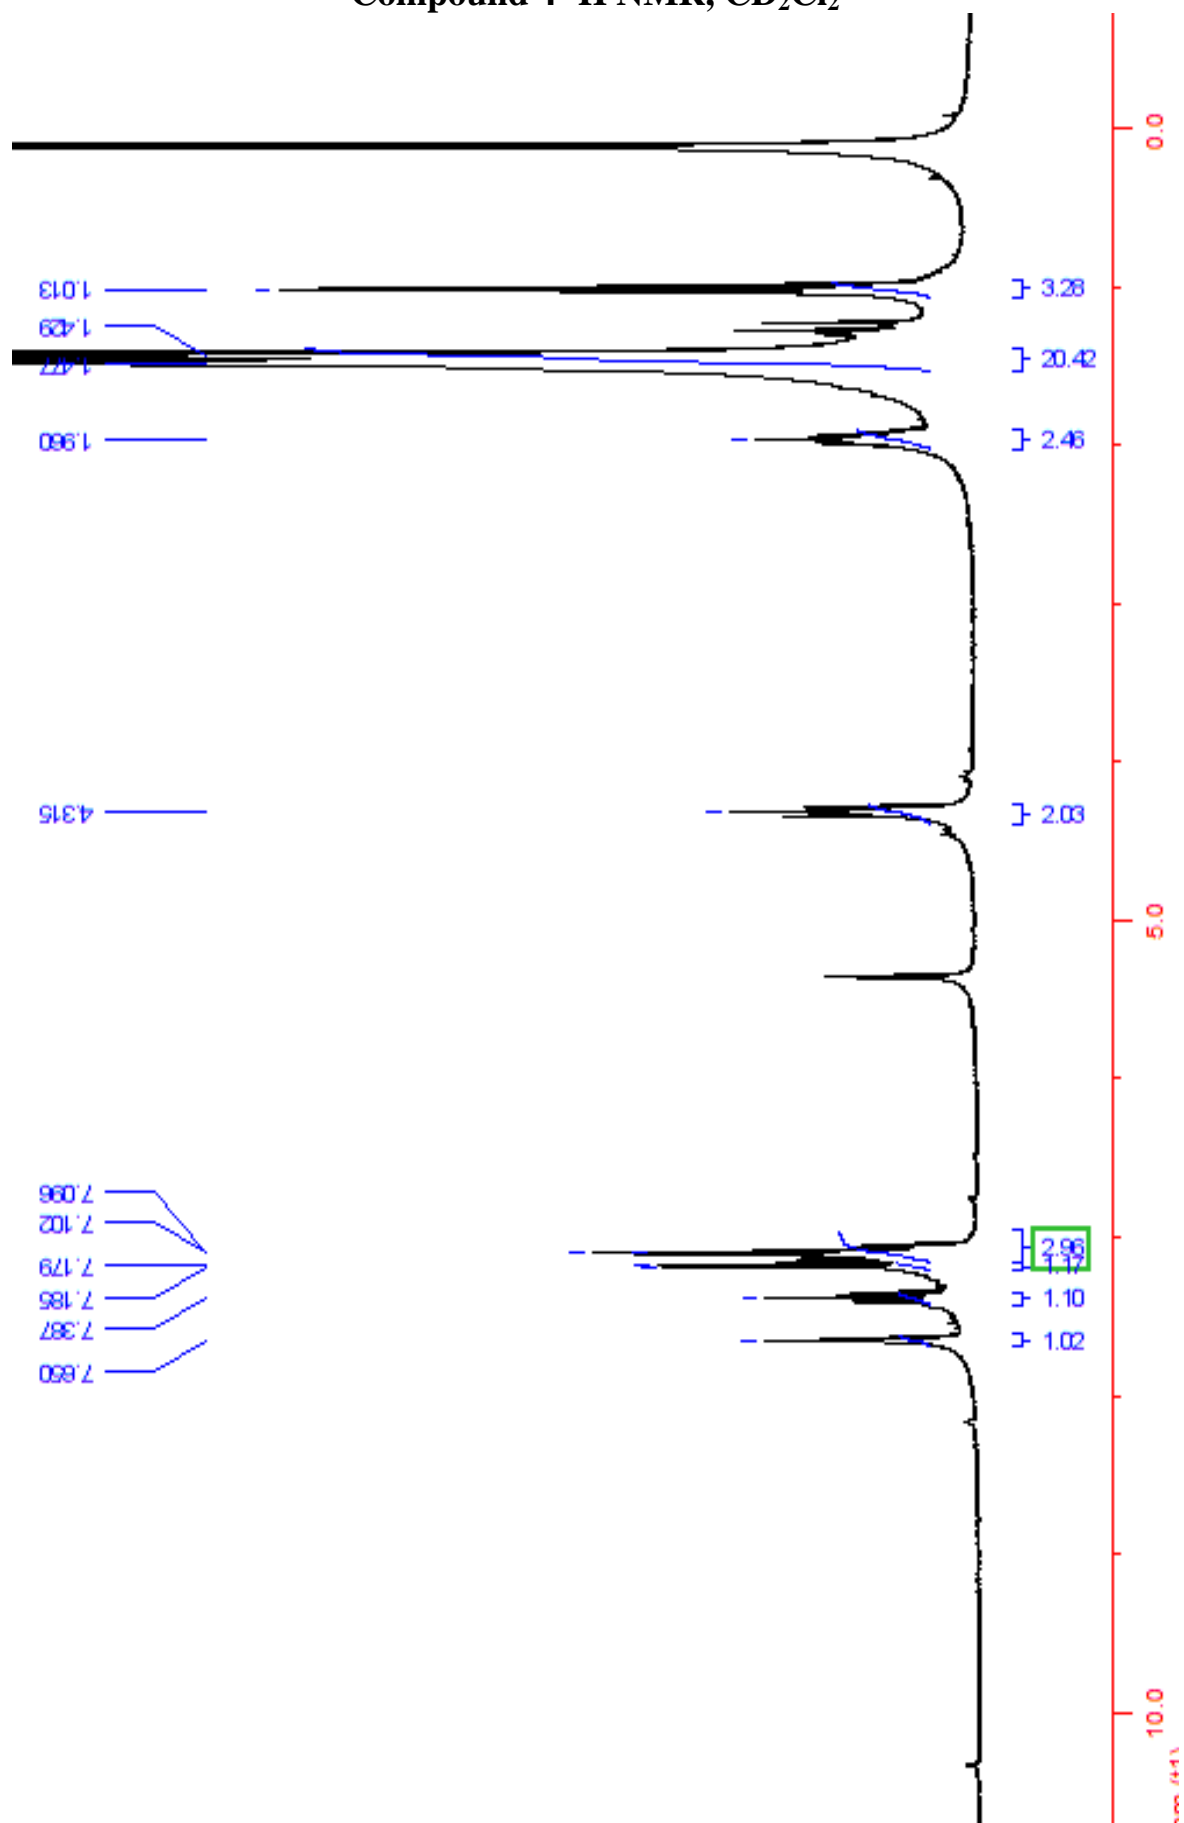

**Compound 4**  $^{13}\text{C}\{^1\text{H}\}$  NMR,  $\text{CD}_2\text{Cl}_2$

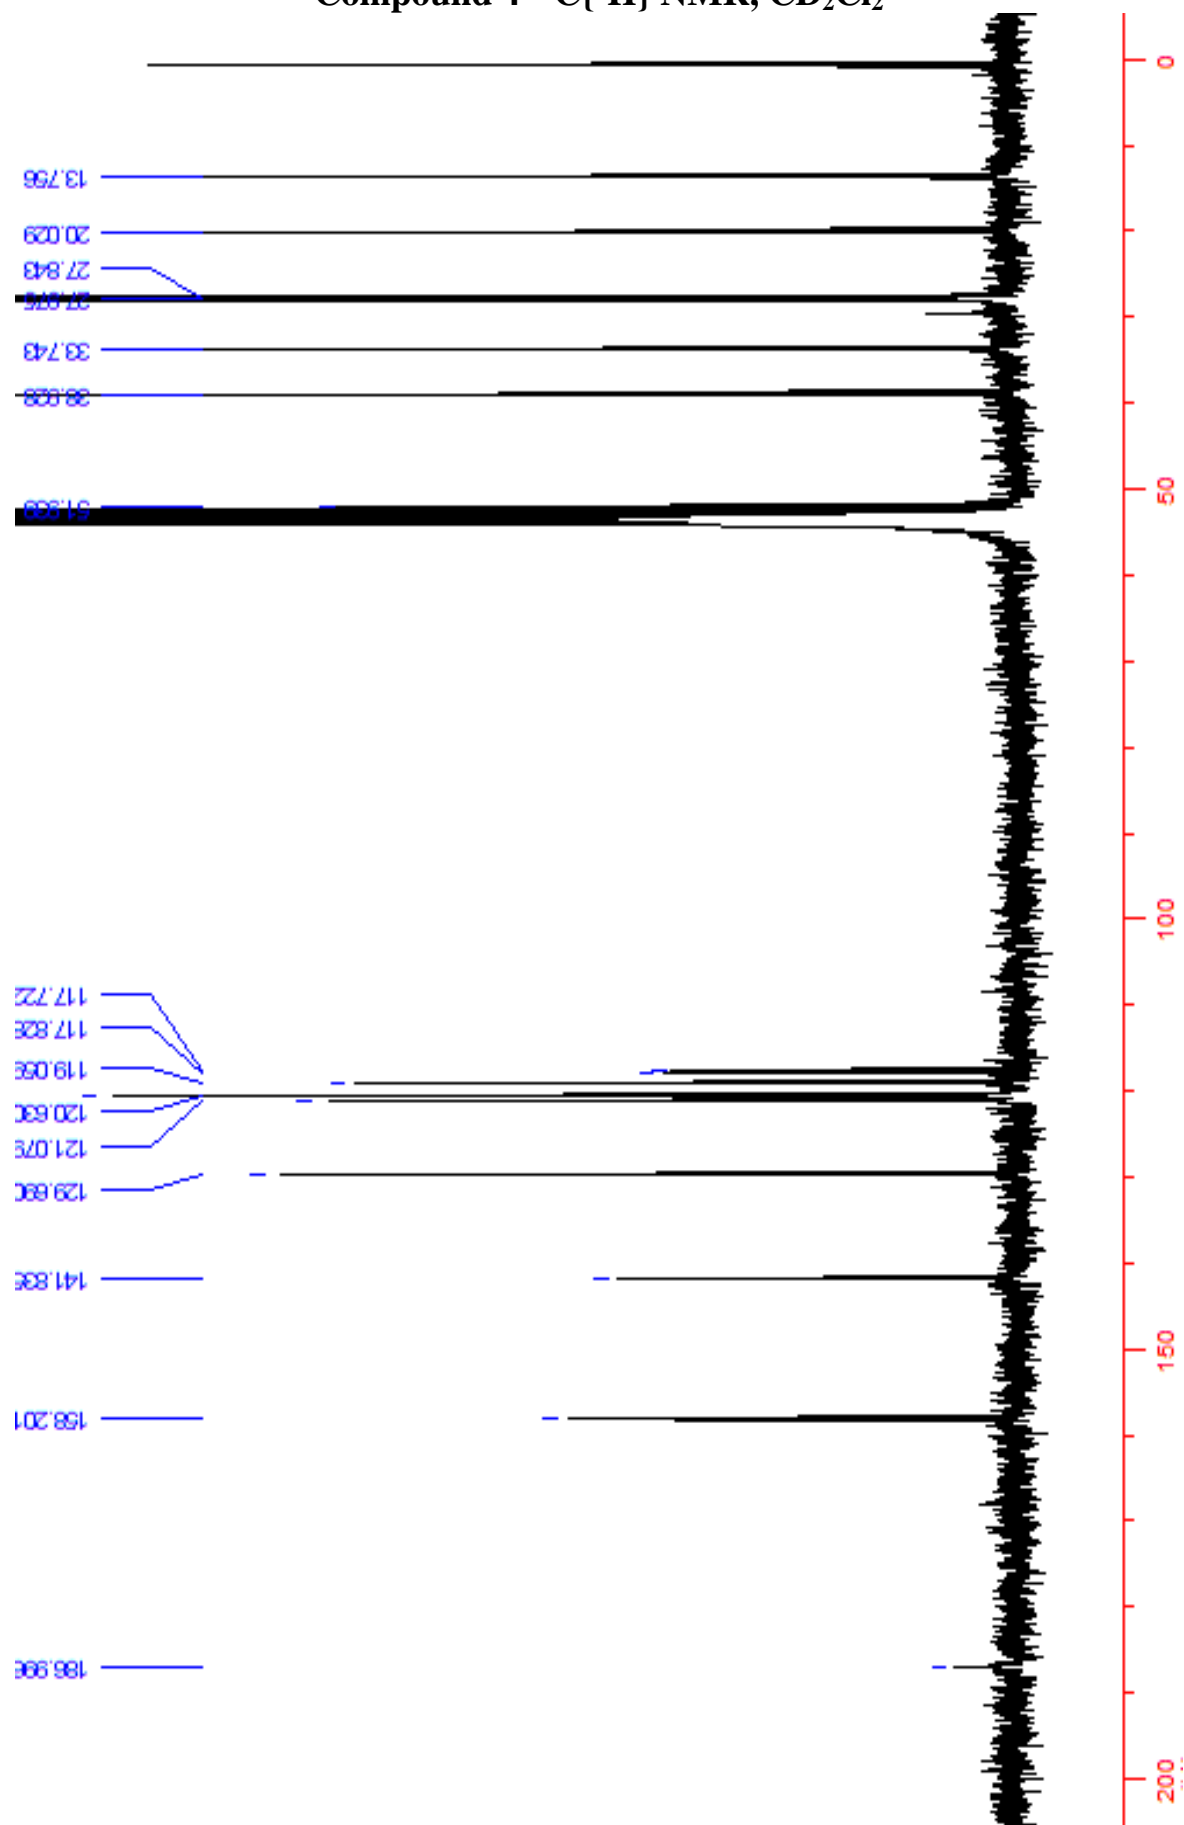

Supplement: b911439d.pdf [file b911439d.pdf]
